# Supplementary material for: Physiological responses to acute cold exposure in young lean men
Source: PubMed Central journal article supplement (PMC5937792; doi:10.1371/journal.pone.0196543), 2018-05-07
Supplement: pone.0196543.s001.pdf [file pone.0196543.s001.pdf]

## SUPPORTING INFORMATION

**S1 Fig**

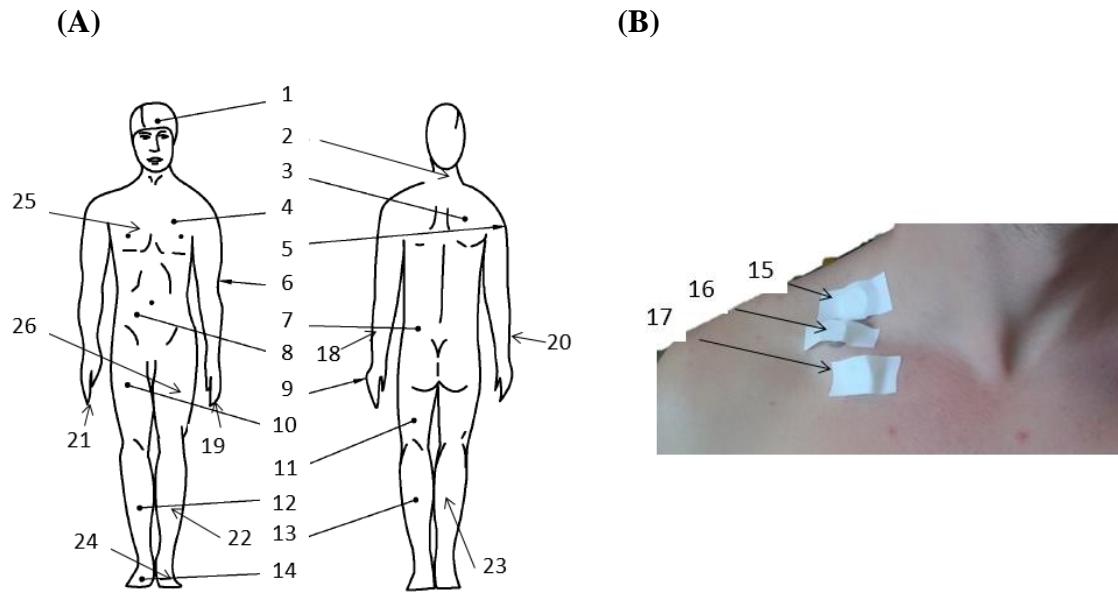

**S1 Fig.** Body anatomical points where iButtons attached to skin. 26 different positions can be distinguished. Panel (A): distribution of the iButtons over whole body, Panel (B): distribution of the iButtons on the right clavicular sites.
