# Supplementary material for: Physiological responses to acute cold exposure in young lean men
Source: PubMed Central journal article supplement (PMC5937792; doi:10.1371/journal.pone.0196543), 2018-05-07
Supplement: pone.0196543.s002.pdf [file pone.0196543.s002.pdf]

## SUPPORTING INFORMATION

**S1 Table.** Equations used to measure skin temperature

| Outcome                              | Reference                                     | iButtons<br>(n) | Anatomical<br>positions. S1 Fig | Equations                                                                                                                                                                                                                                                                                                                                                                                                                                                                                                           |
|--------------------------------------|-----------------------------------------------|-----------------|---------------------------------|---------------------------------------------------------------------------------------------------------------------------------------------------------------------------------------------------------------------------------------------------------------------------------------------------------------------------------------------------------------------------------------------------------------------------------------------------------------------------------------------------------------------|
| Mean skin temperature                | 14 ISO<br>9886-2004<br>(20) ( <i>14-ISO</i> ) | 14              | From 1 to 14                    | $(\text{Forehead} \times 0.07) + (\text{Neck} \times 0.07) + (\text{Right Scapula} \times 0.07) + (\text{Left Chest} \times 0.07) + (\text{Right Deltoides} \times 0.07) + (\text{Left Elbow} \times 0.07) + (\text{Right Abdomen} \times 0.07) + (\text{Left Hand} \times 0.07) + (\text{Left Lumbar} \times 0.07) + (\text{Right Thigh} \times 0.07) + (\text{Left Harmstring} \times 0.07) + (\text{Right Shin bone} \times 0.07) + (\text{Left Gastrocnemius} \times 0.07) + (\text{Right Instep} \times 0.07)$ |
| Proximal skin temperature            | Boon et al.<br>(21) ( <i>Boon</i> )           | 3               | 10,16,8                         | $(\text{Right Thigh} \times 0.383) + (\text{Right Clavicular} \times 0.293) + (\text{Right Abdomen} \times 0.324)$                                                                                                                                                                                                                                                                                                                                                                                                  |
| Distal skin temperature              | Kräuchi et al. (22)<br>( <i>Krauchi</i> )     | 2               | 9, 14                           | $(\text{Left Hand} + \text{Right Instep}) / 2$                                                                                                                                                                                                                                                                                                                                                                                                                                                                      |
| Body temperature gradient            | Boon et al.<br>(21) ( <i>Boon</i> )           | 5               | 9,14,10,16,8                    | $[(\text{Left Hand} + \text{Right Instep}) / 2] - [(\text{Right Thigh} \times 0.383) + (\text{Right Clavicular} \times 0.293) + (\text{Right Abdomen} \times 0.324)]$                                                                                                                                                                                                                                                                                                                                               |
| Supraclavicular temperature gradient | Lee et al.<br>(24) ( <i>Lee S-RC</i> )        | 2               | 15, 25                          | $(\text{Right Supraclavicular(S)} - \text{Right Chest (RC)})$                                                                                                                                                                                                                                                                                                                                                                                                                                                       |
| Peripheral temperature Gradient      | Sessler et al. (23)<br>Right arm              | 2               | 20, 21                          | $(\text{Right Forearm} - \text{Right Top of forefinger})$                                                                                                                                                                                                                                                                                                                                                                                                                                                           |

Table adapted from Martinez-Tellez et al. (64).
