# Supplementary material for: Physiological responses to acute cold exposure in young lean men
Source: PubMed Central journal article supplement (PMC5937792; doi:10.1371/journal.pone.0196543), 2018-05-07
Supplement: pone.0196543.s003.pdf [file pone.0196543.s003.pdf]

## SUPPORTING INFORMATION

**S2 Table.** Time domain parameters of heart rate variability rate across study periods.

|                     | <b>WP</b>    | <b>31%</b>     | <b>64%</b>     | <b>ST</b>      |
|---------------------|--------------|----------------|----------------|----------------|
| <b>Mean RR (ms)</b> | 1064.9 ± 1.8 | 1086.0 ± 105.2 | 1069.9 ± 112.1 | 1025.4 ± 121.6 |
| <b>SDNN</b>         | 70.1 ± 6.2   | 76.4 ± 22.5    | 70.6 ± 20.9    | 81.6 ± 21.3    |
| <b>RMSSD (ms)</b>   | 78.0 ± 1.2   | 91.9 ± 31.1    | 88.6 ± 34.3    | 88.1 ± 37.2    |
| <b>pNN50 (%)</b>    | 50.6 ± 8.6   | 57.1 ± 5.8     | 54.6 ± 15.2    | 46.6 ± 17.5    |

Values are mean ± standard deviation (n = 7). Repeated measures analysis of variance was performed, using Bonferroni correction for pairwise comparisons. No significant differences were observed across periods (P>0.05). Mean RR: mean length of all RR intervals, pNN50: percentage of consecutive normal RR intervals differing more than 50 ms, RMSSD: square root of the mean squared sum of the differences of successive NN intervals, SDNN: standard deviation of all RR length intervals, ST: shivering threshold period, WP: warm period, 31% and 64%: percentage of the individual's time exposed to cold until shivering occurred.
